# Supplementary material for: Genomic Prediction for Grain Yield and Yield-Related Traits in Chinese Winter Wheat
Source: PubMed Central journal article supplement (PMC7073225; doi:10.3390/ijms21041342), 2020-02-17
Supplement: ijms-21-01342-s001.pdf [file ijms-21-01342-s001.pdf]

# Genomic Prediction for Grain Yield and Yield-Related Traits in Chinese Winter Wheat

Mohsin Ali <sup>1</sup>, Yong Zhang <sup>1</sup>, Awais Rasheed <sup>2,3</sup>, Jiankang Wang <sup>1</sup> and Luyan Zhang <sup>1,\*</sup>

<sup>1</sup> National Key Facility for Crop Gene Resources and Genetic Improvement, and Institute of Crop Sciences, Chinese Academy of Agricultural Sciences (CAAS), Beijing 100081, China.; mali1990@yahoo.com (M.A.); zhangyong05@caas.cn (Y.Z.); wangjiankang@caas.cn (J.W.)

<sup>2</sup> International Maize and Wheat Improvement Center (CIMMYT) China Office, c/o CAAS, 12 Zhongguancun South Street, Beijing 100081, China; arasheed@qau.edu.pk

<sup>3</sup> Department of Plant Sciences, Quaid-i-Azam University, Islamabad 45320, Pakistan

\* Correspondence: zhangluyan@caas.cn; Tel.: +86-10-82108572

Supplementary figures and tables

**Table S1.** Summary statistics of yield and yield-related traits for the 166 wheat accessions in six environments.

| Trait <sup>1</sup> | Cropping season          | Min             | Max      | Mean    | Variance   | Heritability |            |
|--------------------|--------------------------|-----------------|----------|---------|------------|--------------|------------|
|                    |                          |                 |          |         |            | Plot level   | Mean level |
| GY                 | Anyang (2012-2013)       | 6267.85         | 12488.89 | 9318.19 | 1574238.93 | 0.75         | 0.90       |
|                    | Shangqiu (2012-2013)     | 3068.44         | 9074.07  | 6320.25 | 1169743.31 | 0.79         | 0.92       |
|                    | Anyang (2013-2014)       | 5859.77         | 12547.11 | 9178    | 1507951.65 | 0.76         | 0.91       |
|                    | Shangqiu (2013-2014)     | 5065.33         | 11373.78 | 8562.35 | 1330662.32 | 0.78         | 0.91       |
|                    | Anyang (2014-2015)       | 4677.78         | 9355     | 7328.31 | 1196005.38 | 0.88         | 0.96       |
|                    | Shijiazhuang (2014-2015) | 3638.88         | 7683.33  | 6155.99 | 729754.45  | 0.87         | 0.95       |
|                    | BLUE <sup>2</sup>        | 5090.46         | 8535.81  | 7268.81 | 548010.17  |              |            |
| SN                 | Anyang (2012-2013)       | 356             | 943      | 693     | 12150      | 0.89         | 0.96       |
|                    | Shangqiu (2012-2013)     | 276             | 804      | 534     | 9395       | 0.88         | 0.96       |
|                    | Anyang (2013-2014)       | 291             | 846      | 578     | 7633       | 0.88         | 0.96       |
|                    | Shangqiu (2013-2014)     | 220.44          | 892      | 632     | 8488       | 0.89         | 0.96       |
|                    | Anyang (2014-2015)       | NA <sup>3</sup> | NA       | NA      | NA         | NA           | NA         |
|                    | Shijiazhuang (2014-2015) | NA              | NA       | NA      | NA         | NA           | NA         |
|                    | BLUE                     | 297             | 834      | 605     | 6680       |              |            |
| TKW                | Anyang (2012-2013)       | 25.26           | 56.09    | 41.14   | 29.06      | 0.90         | 0.97       |
|                    | Shangqiu (2012-2013)     | 25.67           | 56.26    | 42.16   | 36.25      | 0.83         | 0.93       |
|                    | Anyang (2013-2014)       | 28.33           | 63.42    | 49.82   | 32.02      | 0.93         | 0.98       |
|                    | Shangqiu (2013-2014)     | 22.50           | 62.166   | 45.84   | 42.60      | 0.80         | 0.92       |
|                    | Anyang (2014-2015)       | 24.77           | 50.66    | 39.38   | 25.85      | 0.85         | 0.94       |
|                    | Shijiazhuang (2014-2015) | 22.95           | 49.98    | 39.64   | 27.02      | 0.92         | 0.97       |
|                    | BLUE                     | 25.66           | 54.51    | 43.17   | 24.49      |              |            |
| SL                 | Anyang (2012-2013)       | 6.83            | 12.66    | 8.94    | 1.00       | 0.81         | 0.93       |
|                    | Shangqiu (2012-2013)     | 7.93            | 13.73    | 9.64    | 1.11       | 0.70         | 0.88       |
|                    | Anyang (2013-2014)       | 6.70            | 11.40    | 8.83    | 1.02       | 0.77         | 0.91       |
|                    | Shangqiu (2013-2014)     | 7.23            | 12.40    | 9.54    | 1.33       | 0.77         | 0.91       |
|                    | Anyang (2014-2015)       | 7.64            | 12.82    | 9.58    | 1.08       | 0.73         | 0.89       |
|                    | Shijiazhuang (2014-2015) | 7.24            | 12.78    | 8.93    | 0.94       | 0.88         | 0.96       |
|                    | BLUE                     | 7.36            | 12.33    | 9.15    | 0.74       |              |            |
| HD                 | Anyang (2012-2013)       | 190             | 208      | 198     | 5.20       | 0.93         | 0.97       |
|                    | Shangqiu (2012-2013)     | 184             | 203      | 189     | 11.42      | 0.93         | 0.98       |
|                    | Anyang (2013-2014)       | 177             | 201      | 185     | 11.18      | 1.00         | 1.00       |
|                    | Shangqiu (2013-2014)     | 178             | 201      | 184     | 9.79       | 0.93         | 0.98       |
|                    | Anyang (2014-2015)       | 188             | 206      | 195     | 5.78       | 0.94         | 0.98       |

|    |                          |       |        |       |        |      |      |
|----|--------------------------|-------|--------|-------|--------|------|------|
|    | Shijiazhuang (2014-2015) | 195   | 215    | 199   | 5.36   | 0.93 | 0.98 |
|    | BLUE                     | 179   | 202    | 187   | 9.68   |      |      |
| PH | Anyang (2012-2013)       | 63.33 | 145    | 84.10 | 165.73 | 0.96 | 0.99 |
|    | Shangqiu (2012-2013)     | 55    | 133.33 | 80.11 | 135.21 | 0.93 | 0.98 |
|    | Anyang (2013-2014)       | 58.23 | 135.66 | 77.60 | 171.62 | 0.91 | 0.97 |
|    | Shangqiu (2013-2014)     | 59.76 | 130.13 | 82.89 | 121.44 | 0.94 | 0.98 |
|    | Anyang (2014-2015)       | 69.86 | 136.26 | 91.52 | 108.00 | 0.92 | 0.97 |
|    | Shijiazhuang (2014-2015) | 63.43 | 120.09 | 81.75 | 93.41  | 0.93 | 0.98 |
|    | BLUE                     | 62.59 | 132.39 | 83.36 | 112.06 |      |      |

<sup>1</sup> GY, grain yield (Kg·ha<sup>-1</sup>); SN, spike number per square meter; TKW, thousand-grain weight (g); SL, spike length (cm); HD, heading days (d); PH, plant height (cm). <sup>2</sup>BLUE, best linear unbiased estimation. <sup>3</sup> No observation in the environment.

**Table S2.** Distribution of markers used for genomic selection under five missing marker rate (underlined; %) levels (i.e., 0, < 20, < 40, < 60, and < 80%) and three minor allele frequency (MAF; %) levels (i.e., > 0, > 5, and > 10%).

| Chr.         | 0% MAF   |           |           |           |           | 5% MAF   |           |           |           |           | 10% MAF  |           |           |           |           |
|--------------|----------|-----------|-----------|-----------|-----------|----------|-----------|-----------|-----------|-----------|----------|-----------|-----------|-----------|-----------|
|              | <u>0</u> | <u>20</u> | <u>40</u> | <u>60</u> | <u>80</u> | <u>0</u> | <u>20</u> | <u>40</u> | <u>60</u> | <u>80</u> | <u>0</u> | <u>20</u> | <u>40</u> | <u>60</u> | <u>80</u> |
| 1A           | 37       | 254       | 289       | 323       | 368       | 18       | 331       | 339       | 350       | 355       | 11       | 261       | 266       | 277       | 282       |
| 1B           | 45       | 333       | 375       | 409       | 448       | 14       | 300       | 308       | 312       | 320       | 14       | 249       | 254       | 258       | 264       |
| 1D           | 41       | 236       | 276       | 292       | 317       | 1        | 170       | 175       | 177       | 179       | 1        | 138       | 141       | 143       | 145       |
| 2A           | 64       | 319       | 360       | 392       | 433       | 27       | 368       | 383       | 391       | 401       | 18       | 293       | 305       | 309       | 317       |
| 2B           | 62       | 448       | 506       | 566       | 635       | 22       | 374       | 385       | 392       | 397       | 16       | 292       | 299       | 303       | 306       |
| 2D           | 46       | 257       | 287       | 306       | 349       | 8        | 177       | 183       | 188       | 191       | 4        | 142       | 148       | 152       | 153       |
| 3A           | 53       | 290       | 327       | 366       | 407       | 15       | 325       | 336       | 342       | 346       | 11       | 267       | 275       | 281       | 285       |
| 3B           | 54       | 328       | 373       | 399       | 439       | 16       | 315       | 325       | 327       | 330       | 13       | 260       | 270       | 271       | 274       |
| 3D           | 32       | 169       | 197       | 225       | 252       | 11       | 132       | 133       | 138       | 143       | 9        | 112       | 113       | 118       | 122       |
| 4A           | 47       | 229       | 249       | 280       | 311       | 11       | 284       | 288       | 292       | 294       | 5        | 235       | 237       | 241       | 243       |
| 4B           | 32       | 211       | 245       | 274       | 310       | 9        | 184       | 192       | 196       | 199       | 6        | 160       | 167       | 171       | 174       |
| 4D           | 24       | 124       | 140       | 152       | 172       | 8        | 84        | 87        | 89        | 90        | 6        | 65        | 66        | 68        | 68        |
| 5A           | 43       | 267       | 310       | 348       | 375       | 11       | 279       | 288       | 297       | 299       | 6        | 230       | 234       | 240       | 244       |
| 5B           | 57       | 366       | 415       | 454       | 496       | 7        | 308       | 321       | 328       | 335       | 4        | 249       | 262       | 268       | 275       |
| 5D           | 48       | 229       | 252       | 276       | 308       | 10       | 140       | 143       | 147       | 148       | 5        | 114       | 116       | 120       | 120       |
| 6A           | 46       | 242       | 287       | 310       | 346       | 13       | 259       | 268       | 273       | 277       | 10       | 222       | 228       | 233       | 236       |
| 6B           | 47       | 287       | 326       | 359       | 393       | 13       | 244       | 252       | 256       | 261       | 10       | 198       | 204       | 208       | 212       |
| 6D           | 31       | 155       | 176       | 195       | 210       | 5        | 91        | 94        | 97        | 99        | 3        | 76        | 78        | 81        | 83        |
| 7A           | 50       | 312       | 365       | 407       | 444       | 15       | 339       | 354       | 367       | 376       | 12       | 284       | 296       | 305       | 314       |
| 7B           | 36       | 291       | 336       | 368       | 419       | 6        | 233       | 243       | 251       | 256       | 4        | 190       | 196       | 203       | 208       |
| 7D           | 34       | 219       | 250       | 265       | 293       | 7        | 129       | 133       | 135       | 138       | 5        | 110       | 113       | 116       | 119       |
| Unmapped SNP | 513      | 310<br>8  | 351<br>0  | 3852      | 4272      | 12       | 277       | 283       | 290       | 291       | 8        | 221       | 226       | 230       | 231       |
| A genome     | 340      | 191<br>3  | 218<br>7  | 2426      | 2684      | 11<br>0  | 218<br>5  | 225<br>6  | 231<br>2  | 234<br>8  | 73       | 179<br>2  | 184<br>1  | 188<br>6  | 192<br>1  |
| B genome     | 333      | 226<br>4  | 257<br>6  | 2829      | 3140      | 87       | 195<br>8  | 202<br>6  | 206<br>2  | 209<br>8  | 67       | 159<br>8  | 165<br>2  | 168<br>2  | 171<br>3  |
| D genome     | 256      | 138<br>9  | 157<br>8  | 1711      | 1901      | 50       | 923       | 948       | 971       | 988       | 33       | 757       | 775       | 798       | 810       |
| Total SNP    | 144      | 867<br>4  | 985<br>1  | 1081<br>8 | 1199<br>7 | 25<br>9  | 534<br>3  | 551<br>3  | 563<br>5  | 572<br>5  | 18<br>1  | 436<br>8  | 449<br>4  | 459<br>6  | 467<br>5  |

**Table S3.** The 166 wheat accessions used in genomic prediction for yield and related traits.

| No. | Name                                                 | Origin    |
|-----|------------------------------------------------------|-----------|
| 1   | 11CA40                                               | Henan     |
| 2   | 85Zhong 33                                           | Henan     |
| 3   | Aca 601                                              | Argentina |
| 4   | Aca 801                                              | Argentina |
| 5   | Barra                                                | Italy     |
| 6   | Dorico                                               | Italy     |
| 7   | Genio                                                | Italy     |
| 8   | HK1/6/NVSR3/5/BEZ/TVR/5/CFN/BEZ//SU92/CI13645/3NAI60 | Turkey    |
| 9   | Kanto 107                                            | Japan     |
| 10  | Kitanokaori                                          | Japan     |
| 11  | Klein Flecha                                         | Argentina |
| 12  | Klein Jabal1                                         | Argentina |
| 13  | Lampo                                                | Italy     |
| 14  | Libero                                               | Italy     |
| 15  | Mantol                                               | Italy     |
| 16  | Nidera Baguette 10                                   | Argentina |
| 17  | Nidera Baguette 20                                   | Argentina |
| 18  | Norin 61                                             | Japan     |
| 19  | Norin 67                                             | Japan     |
| 20  | PH 82-2                                              | Shandong  |
| 21  | Printa Colibr 1                                      | Argentina |
| 22  | Sagittario                                           | Italy     |
| 23  | Sunstate                                             | Australia |
| 24  | Abbondanza                                           | Italy     |
| 25  | Funo                                                 | Italy     |
| 26  | Aifeng 3                                             | Shaanxi   |
| 27  | Aikang 58                                            | Henan     |
| 28  | An 1331                                              | Anhui     |
| 29  | Bainong 3217                                         | Henan     |
| 30  | Bainong 64                                           | Henan     |
| 31  | Bima 1                                               | Shaanxi   |
| 32  | Bima 4                                               | Shaanxi   |
| 33  | Fengchan 3                                           | Shaanxi   |
| 34  | Fu 936                                               | Anhui     |
| 35  | Gaoyou 503                                           | Hebei     |
| 36  | Gaocheng 8901                                        | Hebei     |
| 37  | Hengguan 35                                          | Hebei     |

---

|    |              |          |
|----|--------------|----------|
| 38 | Han 6172     | Hebei    |
| 39 | Heng 7228    | Hebei    |
| 40 | Hengguan 33  | Hebei    |
| 41 | Huapei 5     | Henan    |
| 42 | Huaimai 18   | Jiangsu  |
| 43 | Huaimai 20   | Jiangsu  |
| 44 | Huaimai 21   | Jiangsu  |
| 45 | Jimai 19     | Shandong |
| 46 | Jimai 20     | Shandong |
| 47 | Jimai 21     | Shandong |
| 48 | Jimai 22     | Shandong |
| 49 | Jinan 13     | Shandong |
| 50 | Jinan 17     | Shandong |
| 51 | Jining 16    | Shandong |
| 52 | Shiluan 02-1 | Hebei    |
| 53 | Jinhe 9123   | Hebei    |
| 54 | Jinmai 61    | Shanxi   |
| 55 | Lankao 24    | Henan    |
| 56 | Lankao 2     | Henan    |
| 57 | Lankao 906   | Henan    |
| 58 | Liangxing 66 | Shandong |
| 59 | Liangxing 99 | Shandong |
| 60 | Linhan 2     | Shanxi   |
| 61 | Linkang 12   | Shanxi   |
| 62 | Linmai 2     | Shandong |
| 63 | Linmai 4     | Shandong |
| 64 | Lumai 11     | Shandong |
| 65 | Lumai 14     | Shandong |
| 66 | Luami 15     | Shandong |
| 67 | Lumai 21     | Shandong |
| 68 | Lumai 23     | Shandong |
| 69 | Lumai 5      | Shandong |
| 70 | Lumai 6      | Shandong |
| 71 | Lumai 7      | Shandong |
| 72 | Lumai 8      | Shandong |
| 73 | Lumai 9      | Shandong |
| 74 | Luyuan 502   | Shandong |
| 75 | Luohan 2     | Henan    |
| 76 | Luomai 21    | Henan    |
| 77 | Neixiang 188 | Henan    |
| 78 | Neixiang 5   | Henan    |

---

---

|     |                 |          |
|-----|-----------------|----------|
| 79  | Shannong 20     | Shandong |
| 80  | Shaan 150       | Shaanxi  |
| 81  | Shaan 229       | Shaanxi  |
| 82  | Shaan 253       | Shaanxi  |
| 83  | Shaan 354       | Shaanxi  |
| 84  | Shaan 512       | Shaanxi  |
| 85  | Shaan 715       | Shaanxi  |
| 86  | Shaanmai 509    | Shaanxi  |
| 87  | Shaanmai 94     | Shaanxi  |
| 88  | Shaannong 7859  | Shaanxi  |
| 89  | Shaannong 981   | Shaanxi  |
| 90  | Shaanyou 225    | Shaanxi  |
| 91  | Shi 4185        | Hebei    |
| 92  | Shijiazhuang 15 | Hebei    |
| 93  | Shijiazhuang 8  | Hebei    |
| 94  | Shixin 733      | Hebei    |
| 95  | Shixin 828      | Hebei    |
| 96  | Shiyou 17       | Hebei    |
| 97  | Taishan 1       | Shandong |
| 98  | Taishan 5       | Shandong |
| 99  | Wan 23094       | Anhui    |
| 100 | Wanmai 19       | Anhui    |
| 101 | Wanmai 29       | Anhui    |
| 102 | Wanmai 33       | Anhui    |
| 103 | Wanmai 38       | Anhui    |
| 104 | Wanmai 50       | Anhui    |
| 105 | Wanmai 52       | Anhui    |
| 106 | Wanmai 53       | Anhui    |
| 107 | Wennong 14      | Shandong |
| 108 | Wennong 5       | Shandong |
| 109 | Wunong 148      | Shaanxi  |
| 110 | Xinong 1376     | Shaanxi  |
| 111 | Xinong 2000-7   | Shaanxi  |
| 112 | Xinong 291      | Shaanxi  |
| 113 | Xinong 88       | Shaanxi  |
| 114 | Xinong 9795     | Shaanxi  |
| 115 | Xiaoyan 22      | Shaanxi  |
| 116 | Xiaoyan 54      | Shaanxi  |
| 117 | Xiaoyan 6       | Shaanxi  |
| 118 | Xiaoyan 81      | Shaanxi  |
| 119 | Xinmai 19       | Henan    |

---

---

|     |               |          |
|-----|---------------|----------|
| 120 | Xinmai 940818 | Henan    |
| 121 | Xinmai 9      | Henan    |
| 122 | Su 0663       | Anhui    |
| 123 | Sunong 6      | Anhui    |
| 124 | Yannong 15    | Shandong |
| 125 | Yannong 18    | Shandong |
| 126 | Yannong 19    | Shandong |
| 127 | Yanzhan 4110  | Henan    |
| 128 | Yumai 13      | Henan    |
| 129 | Yumai 18      | Henan    |
| 130 | Yumai 21      | Henan    |
| 131 | Yumai 2       | Henan    |
| 132 | Yumai 34      | Henan    |
| 133 | Yumai 35      | Henan    |
| 134 | Yumai 47      | Henan    |
| 135 | Yumai 49      | Henan    |
| 136 | Yumai 50      | Henan    |
| 137 | Yumai 57      | Henan    |
| 138 | Yumai 63      | Henan    |
| 139 | Yumai 7       | Henan    |
| 140 | Zhengmai 9023 | Henan    |
| 141 | Zhengmai 366  | Henan    |
| 142 | Zhengyin 1    | Italy    |
| 143 | Zhengzhou 3   | Henan    |
| 144 | Zhong 892     | Henan    |
| 145 | Zhongmai 871  | Henan    |
| 146 | Zhongmai 875  | Henan    |
| 147 | Zhongmai 895  | Henan    |
| 148 | Zhongyu 5     | Henan    |
| 149 | Zhongyu 9     | Henan    |
| 150 | Zhou 8425B    | Henan    |
| 151 | Zhoumai 11    | Henan    |
| 152 | Zhoumai 12    | Henan    |
| 153 | Zhoumai 13    | Henan    |
| 154 | Zhoumai 16    | Henan    |
| 155 | Zhoumai 18    | Henan    |
| 156 | Zhoumai 19    | Henan    |
| 157 | Zhoumai 22    | Henan    |
| 158 | Zhoumai 23    | Henan    |
| 159 | Zhoumai 25    | Henan    |
| 160 | Zhoumai 26    | Henan    |

---



---

|     |            |          |
|-----|------------|----------|
| 161 | Zhoumai 28 | Henan    |
| 162 | Zhoumai 30 | Henan    |
| 163 | Zhoumai 31 | Henan    |
| 164 | Zhoumai 32 | Henan    |
| 165 | Zimai 12   | Shandong |
| 166 | Zixuan 2   | Shandong |

---

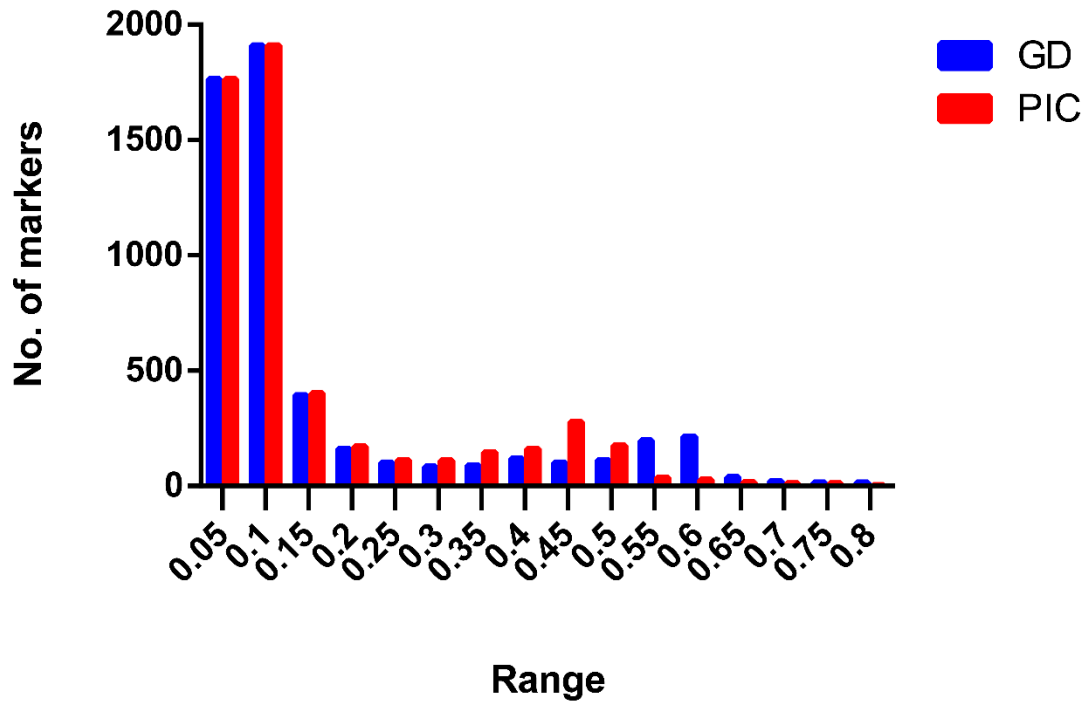

**Figure S1.** Frequency distribution of gene diversity (GD) and polymorphism information content (PIC) under missing marker rate level of 40%.

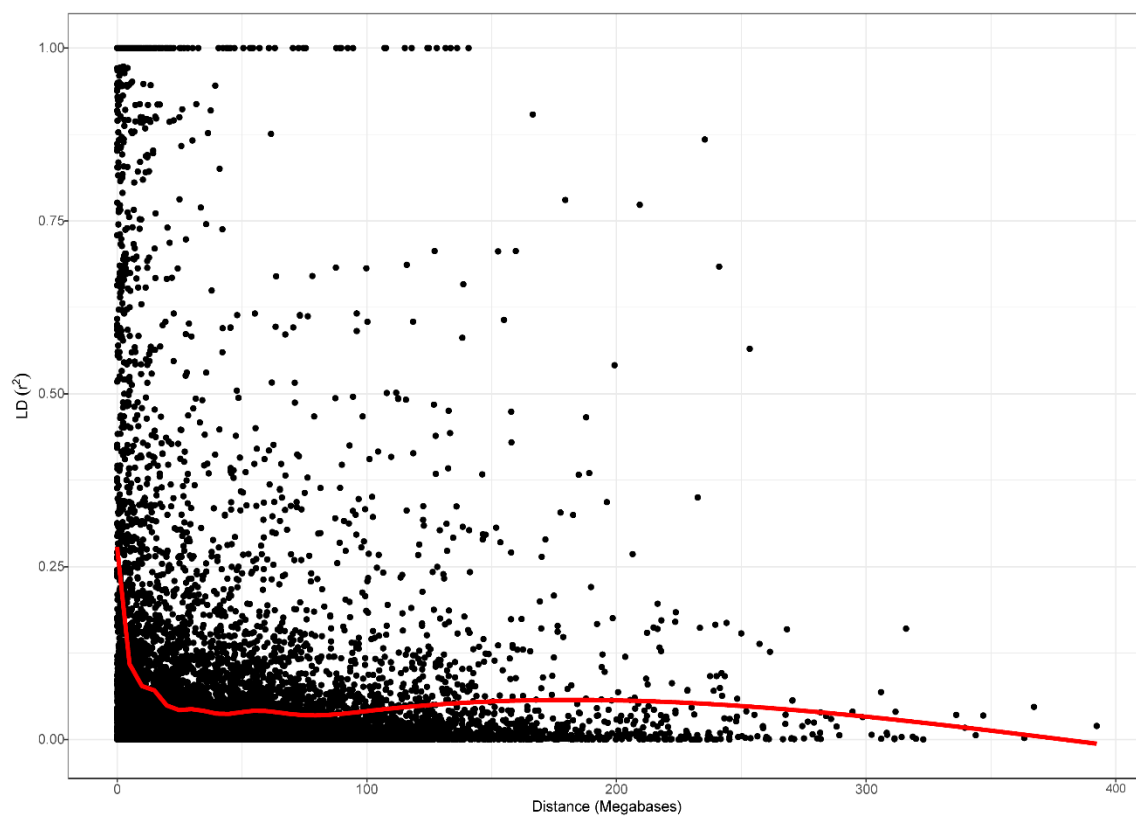

**Figure S2.** Plot for intra-chromosomal linkage disequilibrium (LD) decay vs genetic distance (Mb) in 166 wheat accessions. LD estimates are reported as squared correlations between markers ( $r^2$ ).

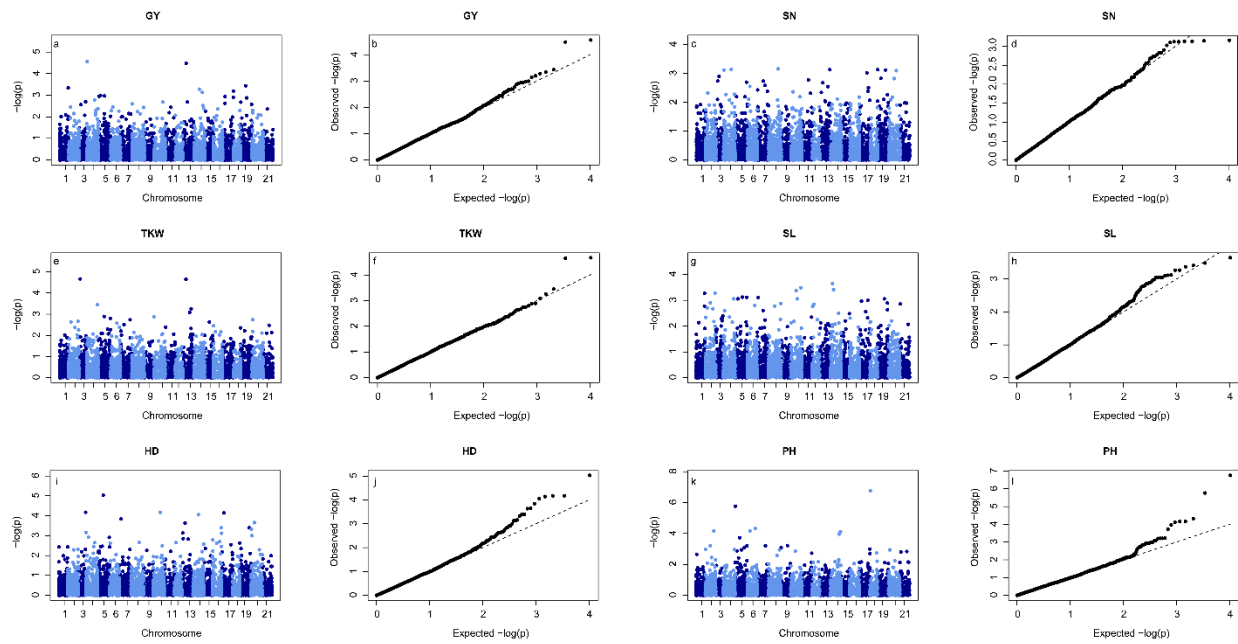

**Figure S3.** Manhattan (a, c, e, g, i, and k) and quantile-quantile (Q-Q) plots (b, d, f, h, j, and l) from GWAS for yield and yield-related traits under the imputed scenario. GY indicates grain yield; SN, spike number per square meter; TKW, thousand-kernel weight; SL, spike length; HD, heading days; PH, plant height.

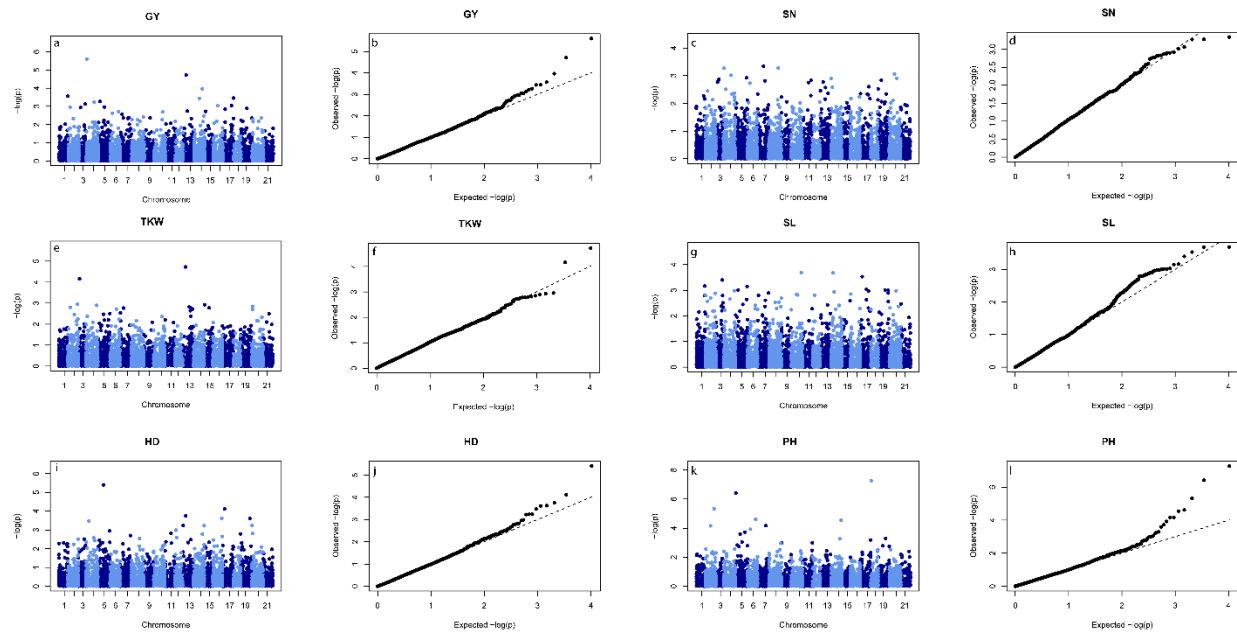

**Figure S4.** Manhattan (a, c, e, g, i, and k) and quantile-quantile (Q-Q) plots (b, d, f, h, j, and l) from GWAS for yield and yield-related traits under the non-imputed scenario. GY indicates grain yield; SN, spike number per square meter; TKW, thousand-kernel weight; SL, spike length; HD, heading days; PH, plant height.
